# Supplementary material for: Physiological and Phylogenetic Characterization of Rhodotorula diobovata DSBCA06, a Nitrophilous Yeast
Source: MDPI journal article supplement (doi:10.3390/biology7030039), 2018-06-30
Supplement: s1 [file s1]

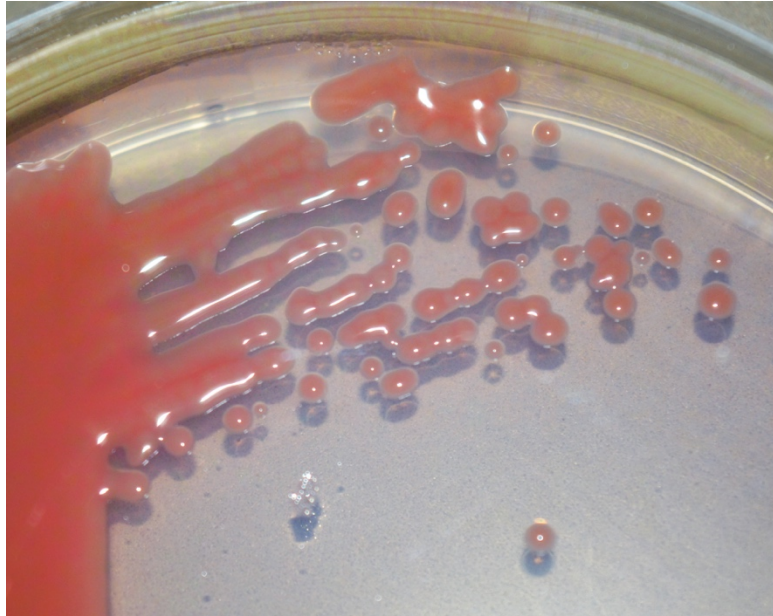

(a)

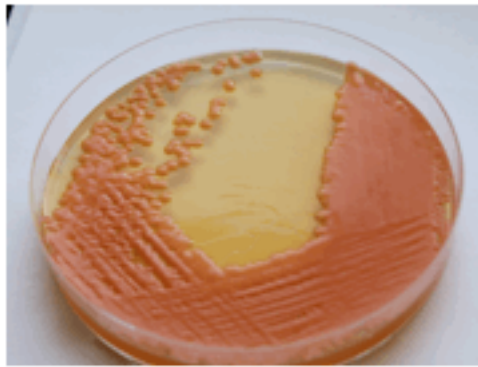

(b)

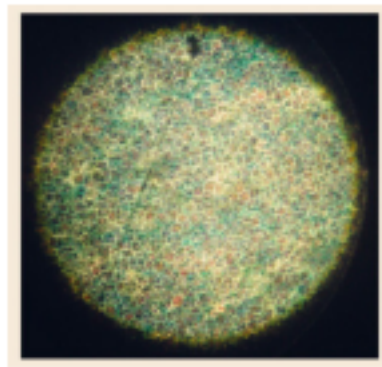

(c)

**Figure S1.** Colonies of *R. diobovata* DSBKA06 in YNB (a) and GYP (b) media; the same yeast cells observed at optic microscope (c).

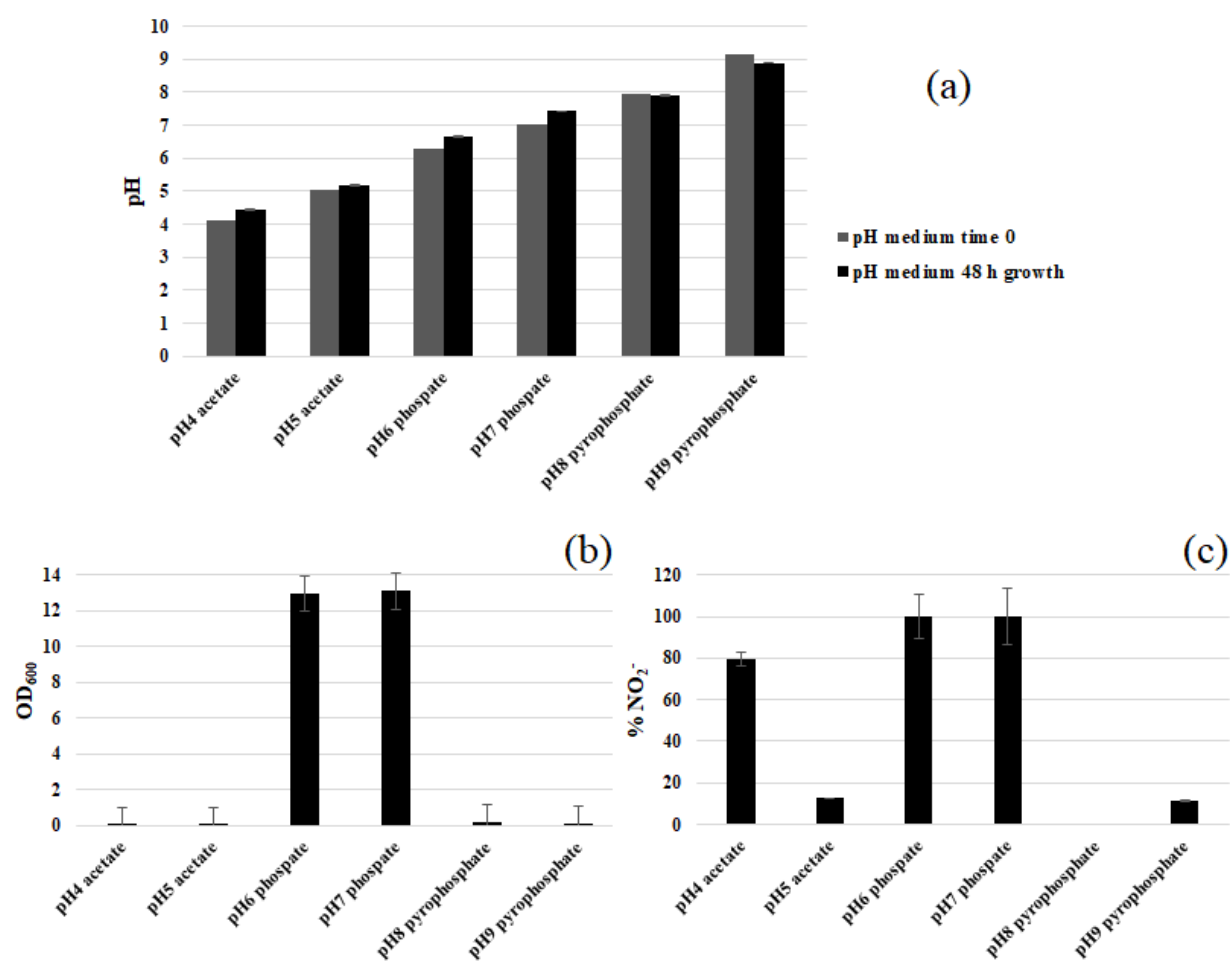

**Figure S2.** Influence of pH on *R. diobovata* DSBKA06 growth. In panel (a) initial and final pH values tested. Panels (b) and (c) report the corresponding growth and nitrite removal 48 h.

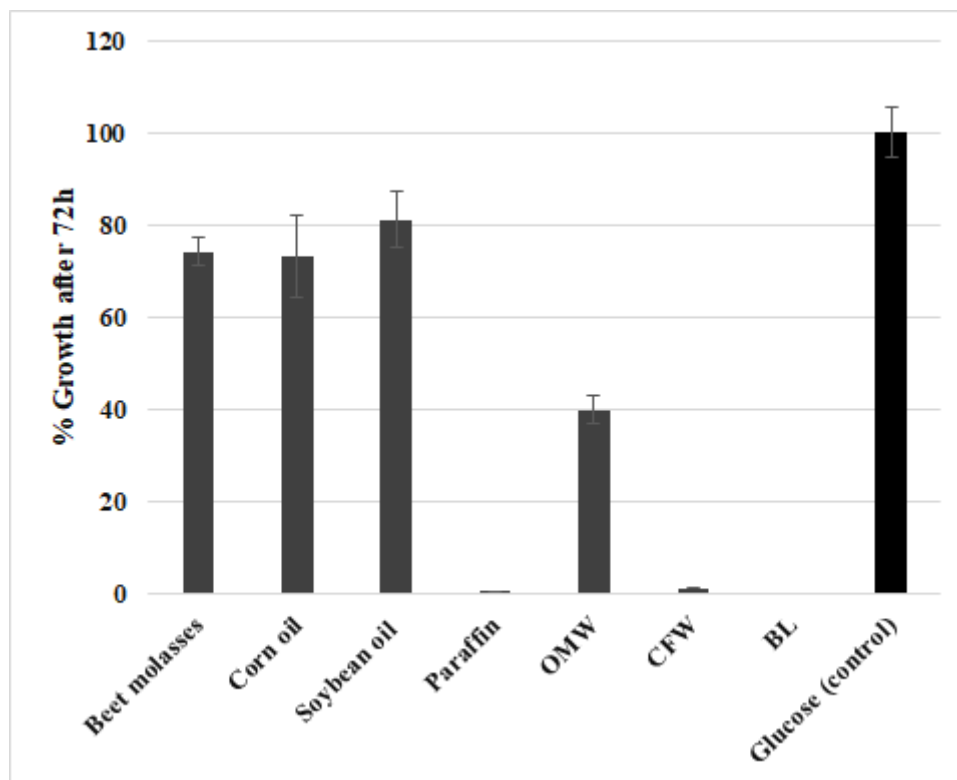

**Figure S3.** *R. diobovata* DSBKA06 growth in YNB using different renewable wastes as carbon sources. (OMW: olive mill wastewater; CFW: cork factory wastewater; BL: neutralized black liquor).
